# Supplementary material for: Tubulovillous adenoma with high-grade dysplasia of the vulva harboring high tumor mutational burden and cancer-associated mutations: a case report
Source: Research Square preprint supplement (doi:10.21203/rs.3.rs-2074403/v1), 2022-09-22
Supplement: Supplementary file 1 [file 465d6938bab2852ec87fe336.xlsx]

## Sheet: Table2 (new)
	Table 2 Cases of intestinal-type adenocarcinoma of vulva and vagina
	Year	First Author	Country	Race	Age	Symptom	Location	Maximum tumor size (cm)	Operation	Adjuvant therapy	Stage	LN meta	Follow (month)	Prognosis	CK20	CK7	CEA	CDX2	p16	ER	PR
	1978	Tiltman	South Africa	NA	50	dyspareunia, discharge	external urethral meatus	2	RV+LND	none	II	positive	12	NED	NA	NA	-	NA	NA	NA	NA
	1988	Fox	UK	NA	35	discharge, bleeding	left lateral and anterior viginal wall	5	WLE	none	NA	NA	NA	NA	NA	NA	NA	NA	NA	NA	NA
	1991	Mortensen	Denmark	NA	43	discharge, bleeding	posterior rim of hymenal caruncle	1.7	WLE	none	NA	NA	27	rec 23m: re-resection	NA	NA	+	NA	NA	NA	NA
	1993	Kennedy	USA	NA	54	vulvar mass	left posterior vulva	2	RV+LND	none	I	negative	120	NED	+	+	-	NA	NA	NA	NA
	1993	Kennedy	USA	NA	63	none	frenulum of labia minor	1.5	WLE	none	I	negative	48	NED	NA	NA	NA	NA	NA	NA	NA
	1995	Ghamande	USA	NA	67	bleeding	frenulum of labia minor	1.7	RV+LND	none	I	negative	17	NED	NA	NA	+	NA	NA	NA	NA
	1999	Nagar	UK	NA	36	bleeding	anterolateral upper vaginal wall	NA	WLE	NA	NA	NA	NA	NA	NA	NA	NA	NA	NA	NA	NA
	1999	Willen	Sweden	NA	57	none	left posterior vestibule	1	WLE	none	I	negative	26	NED	NA	NA	+	NA	NA	NA	NA
	2001	Mudhar	UK	NA	56	bleeding, discharge	posterior vaginal wall	1	WLE	none	I	negative	12	NED	+	-	+	NA	NA	NA	NA
	2001	Zaidi	USA	African	43	vulvar mass, discomfort, bleeding	frenulum of labia minor	5	RV+LND	none	NA	negative	18	NED	NA	NA	+	NA	NA	-	-
	2001	Rodriguez	Spain	NA	69	vulvar mass, itchy	right labia major	1.5	WLE	none	I	negative	36	NED	+	+	+	NA	NA	-	-
	2003	Liu	Taiwan	Asian	49	NA	left labia major	2	RV+LND	none	I	negative	24	NED	NA	NA	NA	NA	NA	NA	NA
	2004	Dube	Canada	NA	58	vulvar mass, discomfort, burning	right labia major	1.5	RV	none	I	negative	16	NED	+	+	NA	NA	NA	-	-
	2005	Lee	Korea	Asian	61	spotting	vaginal introitus (11 o'clock)	2	WLE+laser	none	I	negative	9	rec 9m: WLE	+	+	NA	NA	NA	NA	NA
	2006	Tjalma	Belgium	NA	55	bleeding	posterior and anterior lower vaginal wall	4.5	PE	none	II	negative	20	NED	+	+	NA	NA	NA	-	-
	2012	Cormio	Italy	NA	59	discomfort, burning	left posterior vestibule	NA	RV+LND	chemo	NA	NA	54	DOD	+	+	NA	NA	NA	NA	NA
	2012	Cormio	Italy	NA	42	none	vulva	1	RV+LND	none	NA	NA	39	NED	+	+	NA	NA	NA	NA	NA
	2012	Karkouche	France	Caucasian	31	none	bilateral labia minor	NA	WLE	none	NA	NA	15	NED	+	-	NA	NA	NA	NA	NA
	2013	Wessel	Belgium	Caucasian	68	discharge, vulvar mass, pain	posterior vaginal introitus	1.3	WLE	none	NA	NA	25	NED	+	+	+	NA	NA	-	-
	2013	Musella	Italy	NA	57	vulvar mass, bleeding	right labia major	5	RV+LND	neoadjuvant chemo (PTX+CDDP)	III	positive	4	NED	+	-	+	+	+	-	NA
	2016	Sui	China	Asian	43	vulvar mass, itchy	vaginal introitus	1.5	WLE	chemo (PTX+CBDCA)	I	negative	24	NED	-	+	NA	NA	+	-	-
	2016	Tepeoglu	Turkey	NA	40	vulvar discomfort, bleeding	left labia minor	2	WLE+LND	none	III	positive	38	NED	+	+	+	+	NA	NA	NA
	2017	Matsuzaki	Japan	Asian	68	vulvar mass	vestibule	4	WLE	none	in situ	negative	60	NED	+	-	NA	+	NA	NA	NA
	2017	Lee	Korea	Asian	64	vulvar mass, itchy	right labia major	4	WLE	none	II	negative	12	NED	+	+	+	+	+	NA	NA
	2017	He	China	NA	63	vulvar mass	frenulum of labia minor	2	WLE	none	NA	NA	26	NED	+	+	+	+	-	-	-
	2019	Kurita	Japan	Asian	63	bleeding	vestibule	2	WLE+LND	RT	I	negative	12	NED	+	-	NA	+	NA	NA	NA
	2019	Kaltenecker	USA	African	53	vulvar mass, itchy, pain, discharge	bilateral labia minor	6	WLE	chemo (PTX+CBDCA) +RT	IV	positive	12	DOD	+	-	+	NA	NA	NA	NA
	2019	Ugwu	Nigeria	African	40	vulvar mass, bleeding, pain	posterior lower vaginal wall	6	WLE	CCRT	I	negative	NA	NED	NA	NA	NA	NA	NA	NA	NA
	2022	Moscoso	Spain	NA	66	itchy, discomfort	left labia minor	2	WLE+LND	none	I	negative	12	NED	+	-	+	+	+	-	-
	2022	Sabri	USA	NA	62	bleeding, dysuria, cramping	right upper vaginal wall	3	none	CCRT	IV	NA	NA	NED	+	-	+	+	-	-	-
	2022	present case	Japan	Asian	63	vulvar mass	posterior vulva (7 o'clock)	1	WLE	none	I	negative	27	NED	+	+	NA	+	+	-	-
	UK: United Kingdam, USA; United States of America, WLE: Wide local excision, RV: Radical vulvectomy, PE: Pelvic exenteration, Chemo: Chemotherapy, PTX: Paclitaxel, CDDP: Cisplatin, CBDCA: Carboplatin, CCRT: Concurrent chemoradiotherapy, RT: Radiation therapy, LN: Lymph node, NED: No evidence of disease, DOD: Died of disease, NA: Not available
