# Supplementary material for: Tubulovillous adenoma with high-grade dysplasia of the vulva harboring high tumor mutational burden and cancer-associated mutations: a case report
Source: Research Square preprint supplement (doi:10.21203/rs.3.rs-2074403/v1), 2022-09-22
Supplement: Supplementary file 2 [file 72b030a098a05afea50f9fc0.xlsx]

## Sheet: Table1
	Table 1 Gene mutations in the tumor specimen detected by FoundationOneCDx
	Gene	Alteration	VAF (%)
	TP53	splice site 672+1G>T	67.9
	KEL	M1T	55.7
	RB1	I815fs*11	40.6
	RNF43	E258*	36.4
	PTEN	T319fs*1	23
	GNAS	R201H	1.9
	PIK3CA	E453K	1.8
